# Supplementary material
Source: HighWire-hosted journal article supplement (https://srh.bmj.com/highwire/filestream/143722/field_highwire_adjunct_files/0/bmjsrh-2024-202533supp001_data_supplement.pdf)
Supplement: bmjsrh-2024-202533supp001_data_supplement.pdf [file bmjsrh-2024-202533supp001_data_supplement.pdf]

### **Final analytical coding framework**

- Patient descriptors of medical abortion pain are varied and complex
  - Severity of pain
  - Quality of pain
  - Comparisons to other reproductive experiences
    - Using comparisons to menstruation pain
    - Using comparisons to labour pain
- Current counselling leaves some unprepared for pain experienced
  - Experiencing less pain than expected
  - Experiencing as much pain as expected
    - Health care contact valued
  - Experiencing more pain than expected
    - The role of health care professions in under preparation
    - The role of patient literature /website material in under preparation
    - The impact of under preparation on pain management strategies
- Greater-than-expected pain negatively impacts method choice
  - Reflections on most recent method 'choice'
  - Preference for surgical abortion in the future
  - Adequate pain counselling as part of informed consent
- Patient-centred counselling recommendations to improve abortion experience and informed choices
  - Recommendations related specifically to pain counselling
    - Timing of analgesia
    - Dosing of analgesia
    - Analgesia and vomiting
    - Pre-cautionary pain medications
    - Desire for transparent, realistic accounts
    - Reassurance for less painful experiences and efficacy
    - Online accounts showing a range of experience
  - Other general advice
    - Being accompanied
    - Being comfortable: Position and movement
    - Being prepared with food
    - Being prepared to not be able to leave the house
    - Being prepared for other side effects and how to manage (e.g the chills and blankets)
    - Having pain medication and hot water bottles ready
    - Having the appropriate menstrual products available for bleeding

### **Codes outside the final analytic framework**

- Management of bleeding and passing the pregnancy
- Personal reflections on home-use of medications
- Emotional support and impact
